# Supplementary material
Source: PubMed Central journal article supplement (PMC7062580)
Supplement: NIHMS1049647-supplement-supp_info.pdf [file NIHMS1049647-supplement-supp_info.pdf]

Figure S1

A

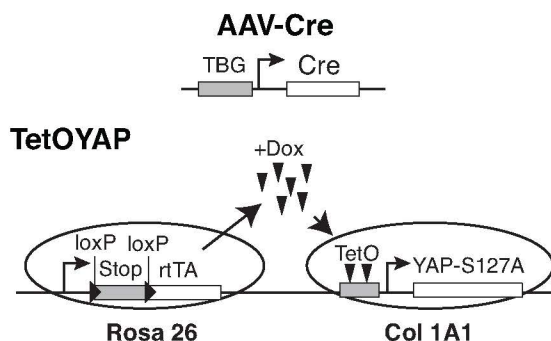

B

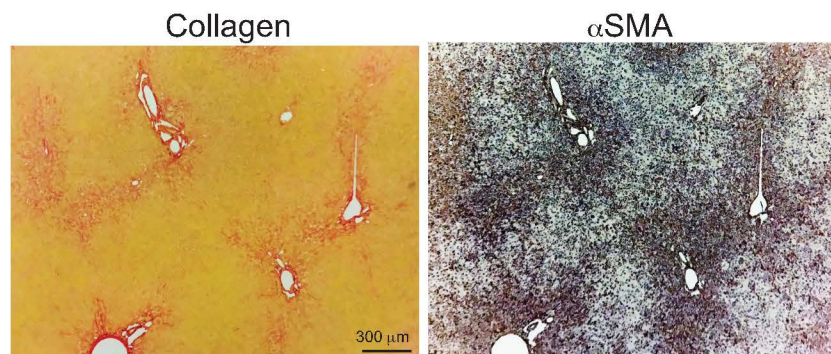

C

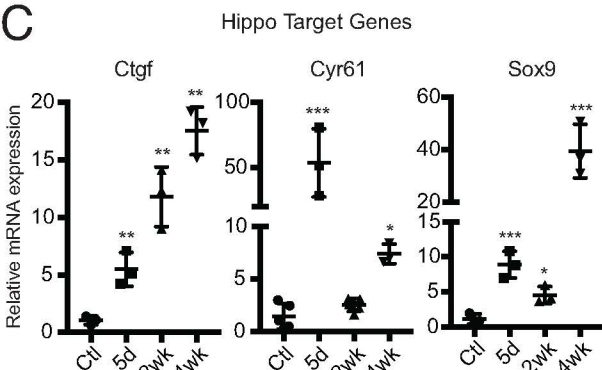

D

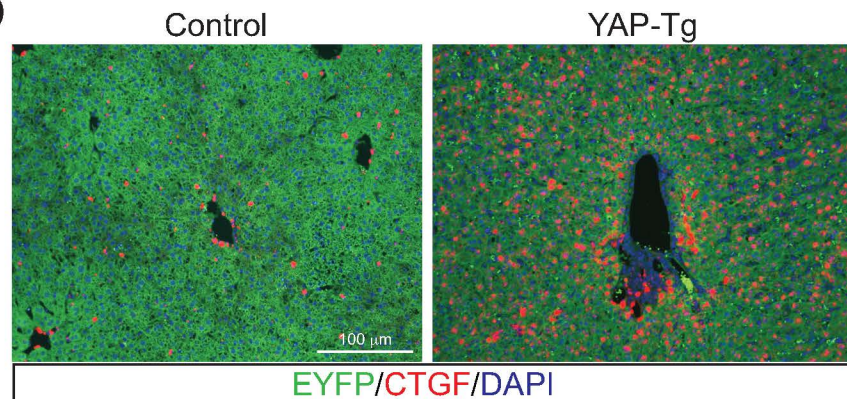

E

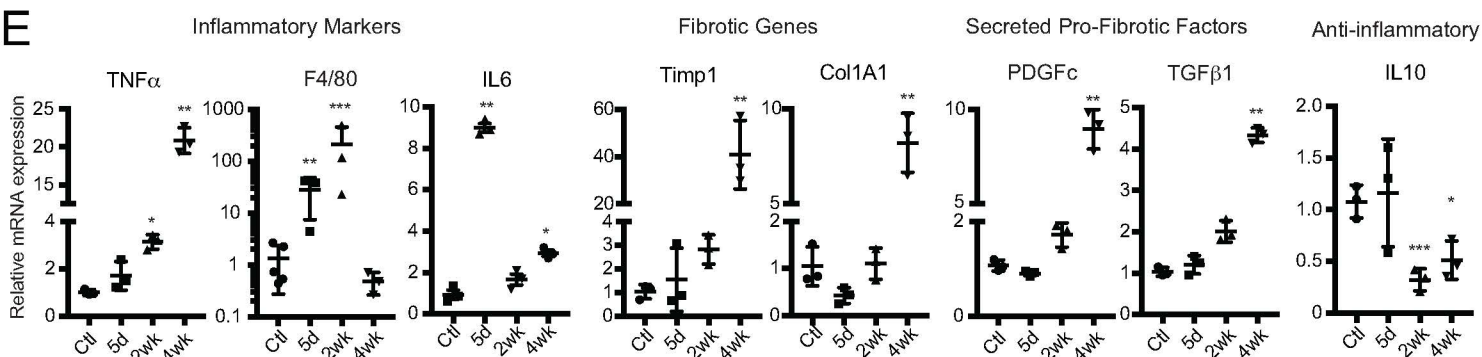

Figure S2

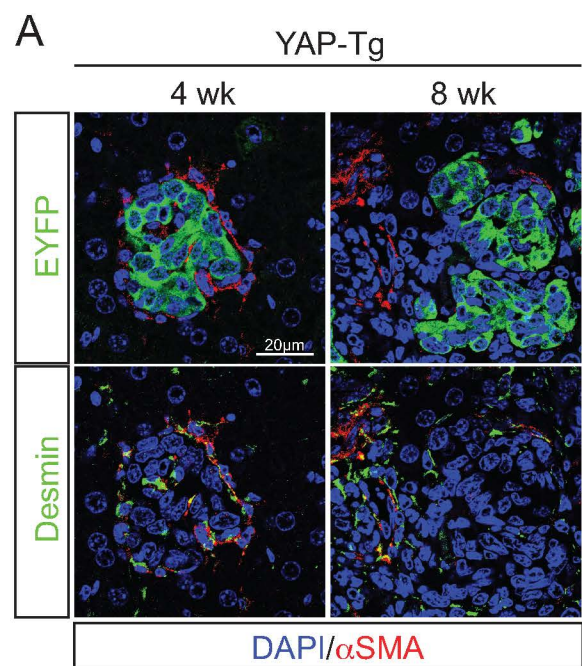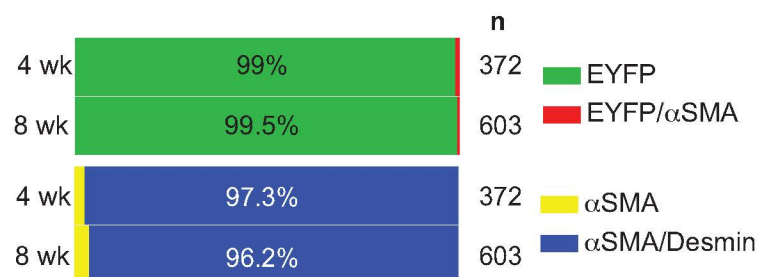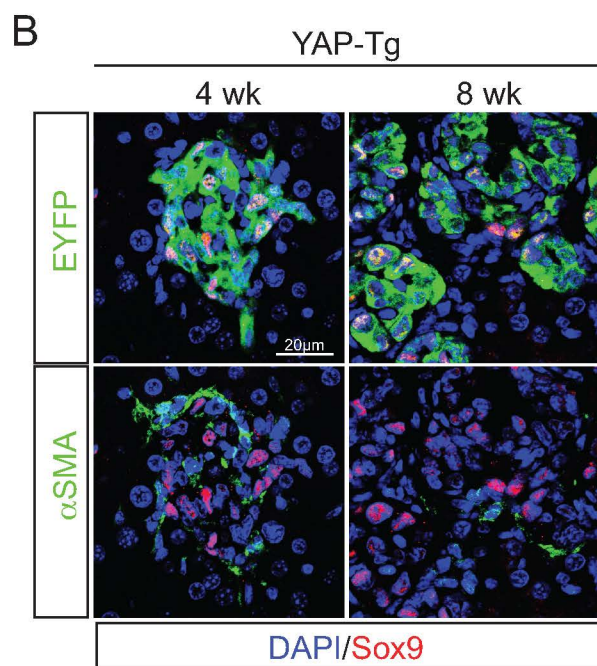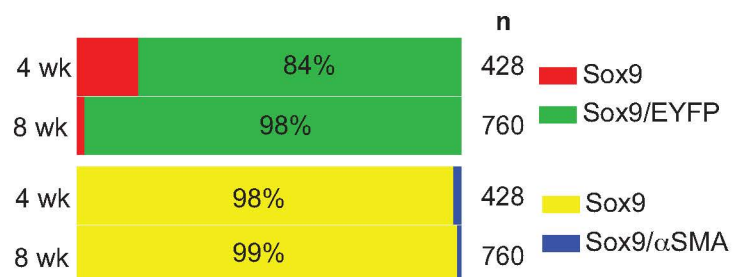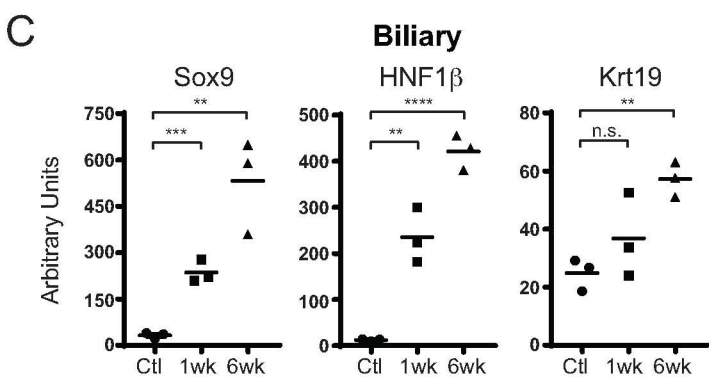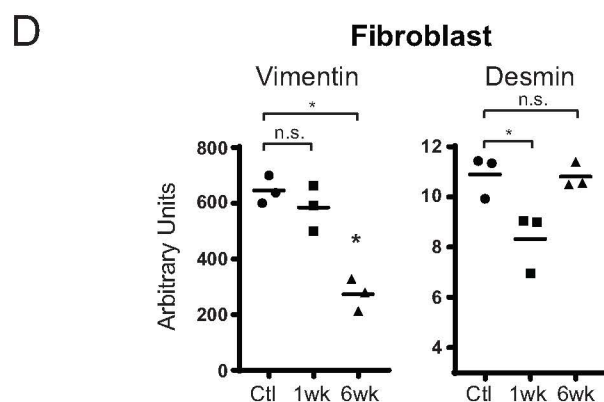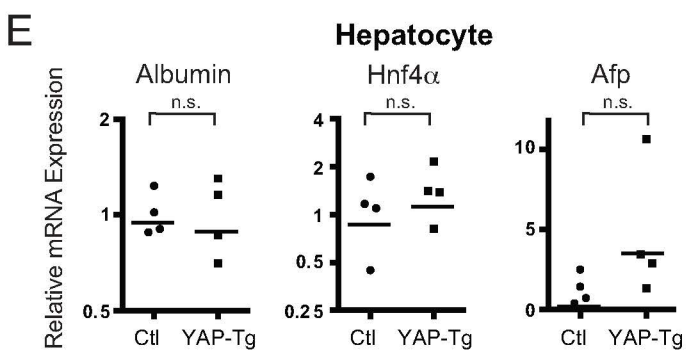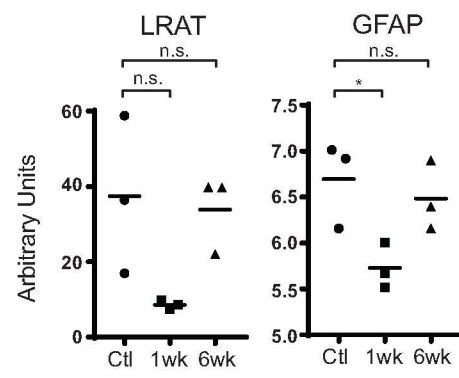

Figure S3

A

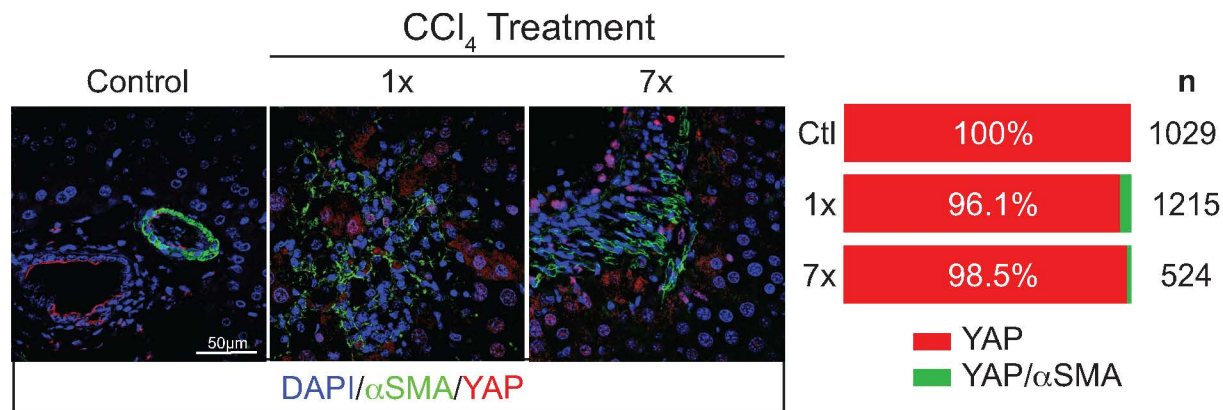

B

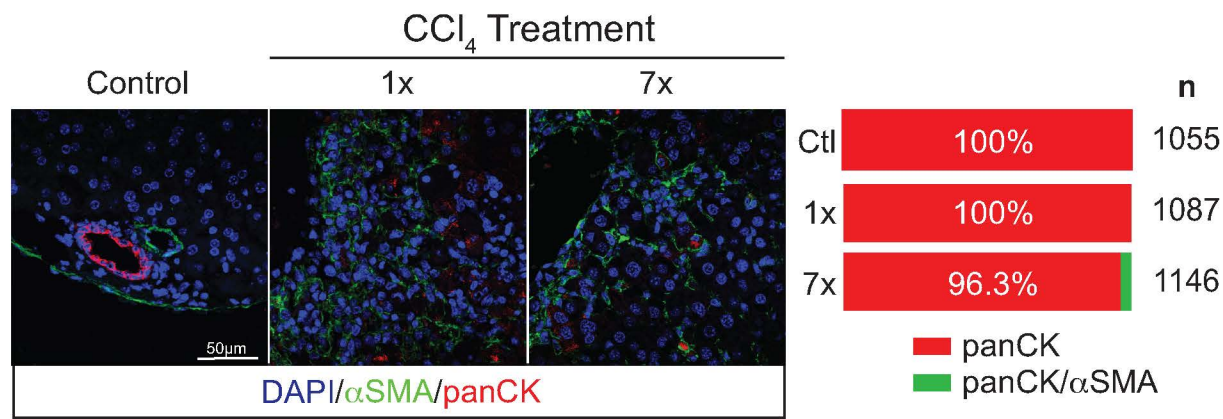



Figure S4

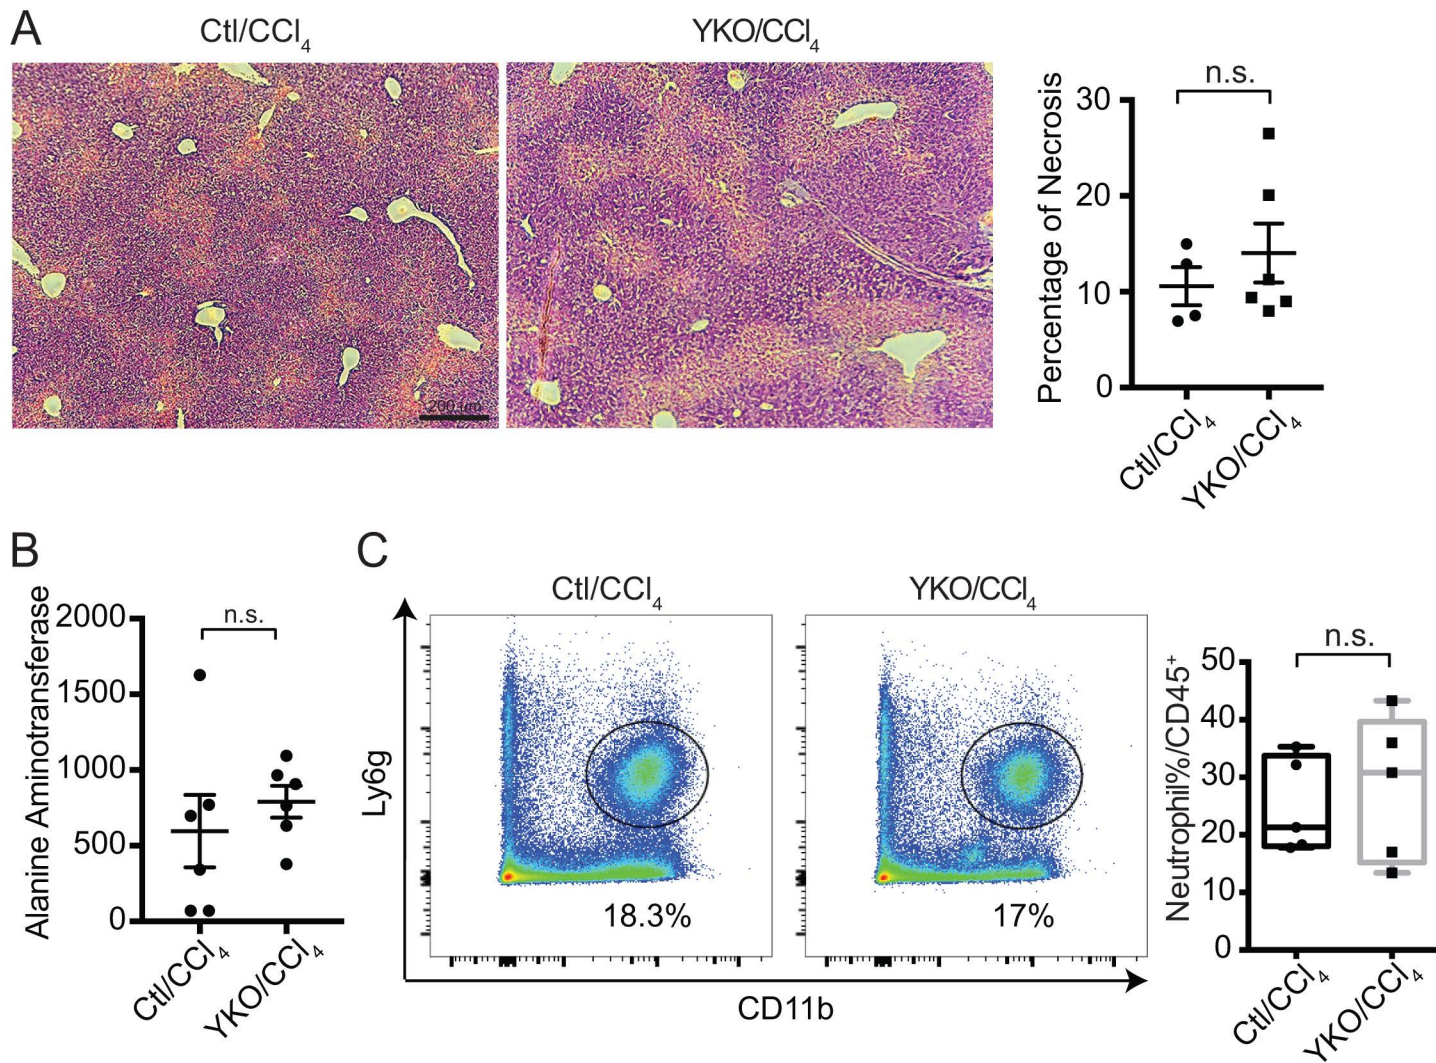



Figure S6

A

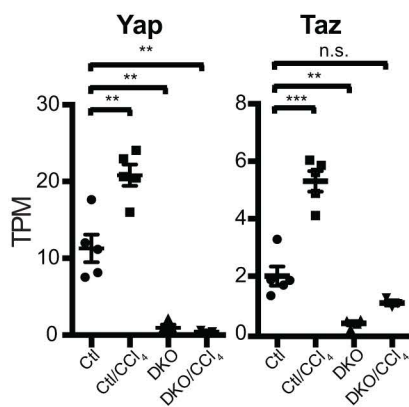

B

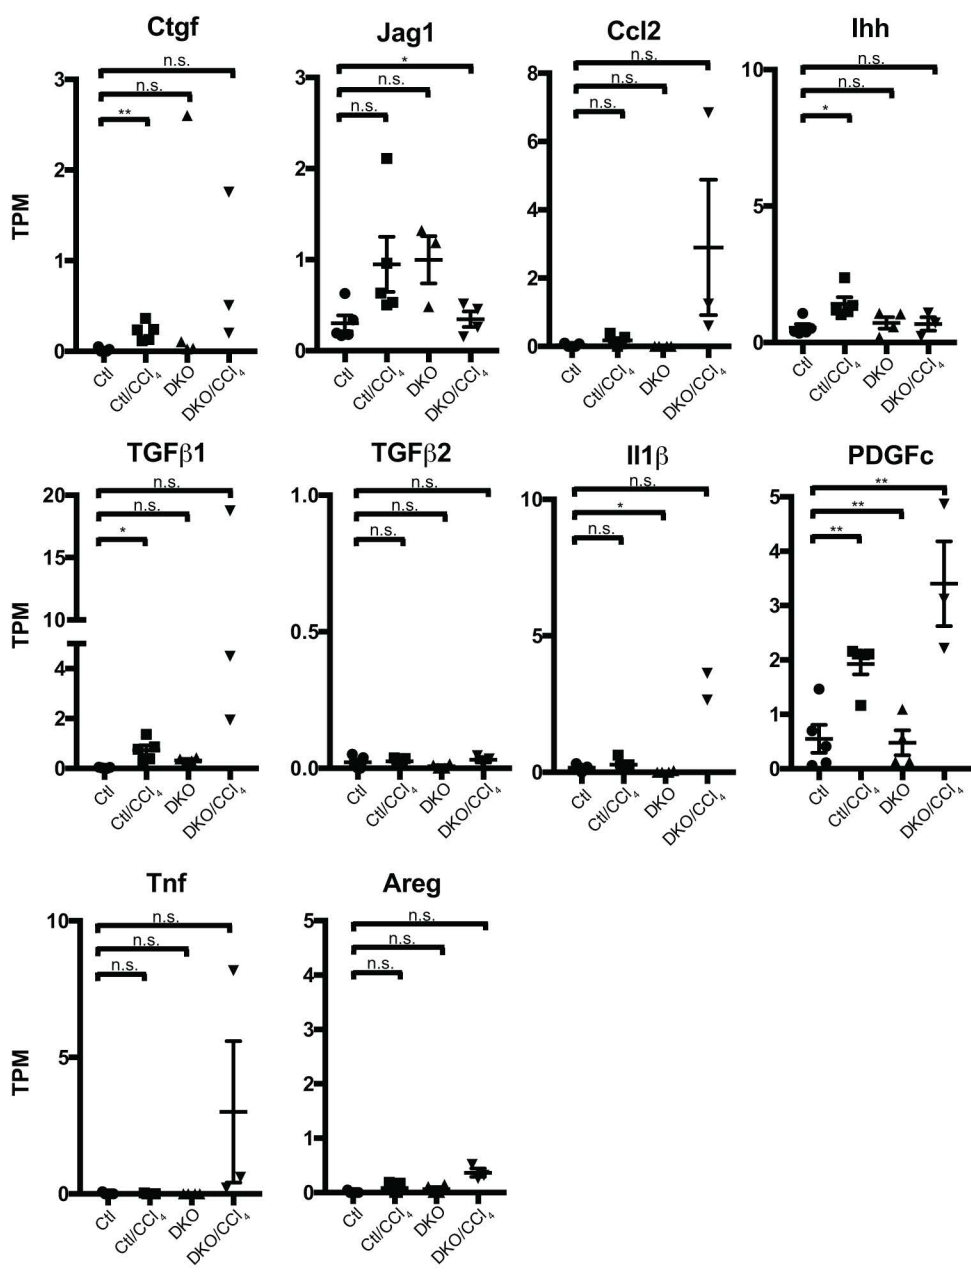

# Figure S7

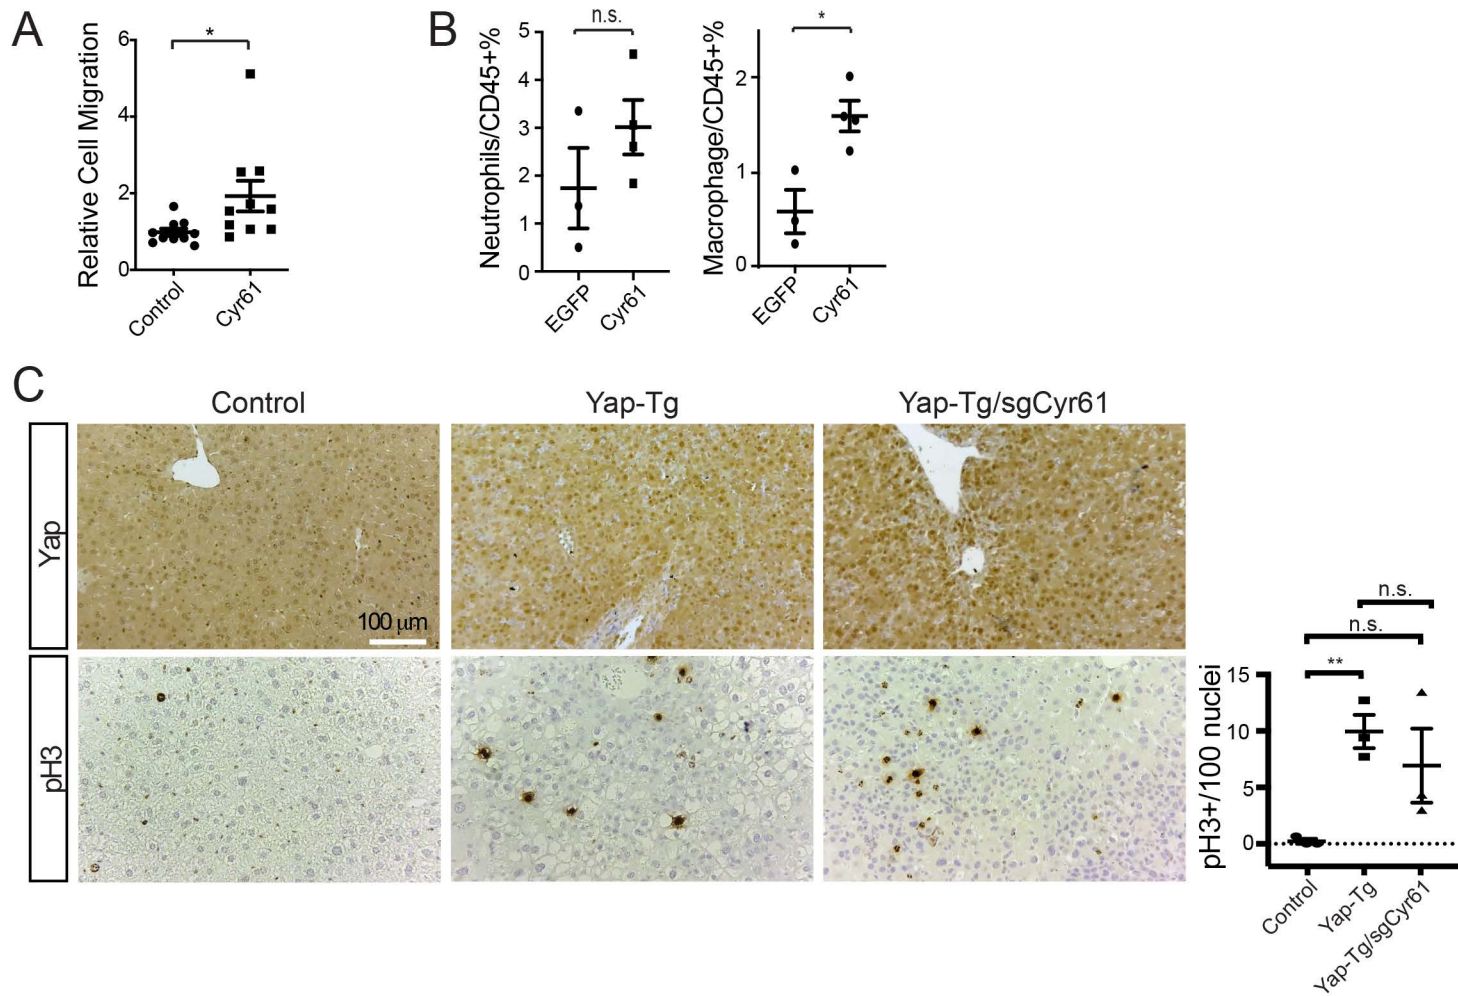

# Figure S8

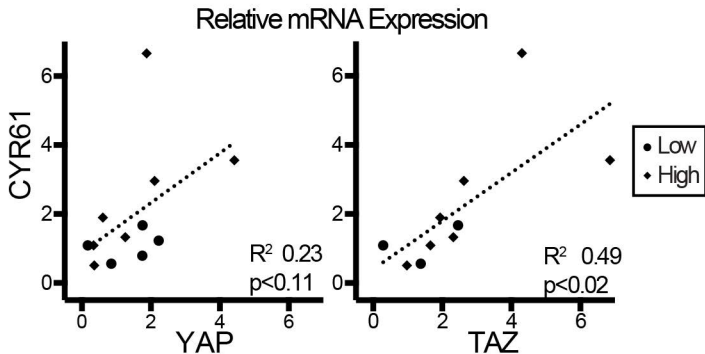



## SUPPLEMENTAL FIGURE LEGENDS

### FIGURE S1. Hepatocyte-specific YAP expression Drives Canonical Hippo Gene

#### Expression

- A. Schematic diagramming strategy of hepatocyte-specific YAP S127A expression.  
Tetracycline-inducible YAP S127A mice contain the Rosa26 locus, a floxed STOP cassette inhibiting a reverse tetracycline transactivator (rtTA) (TetOYAP). TetOYAP mice are intravenously injected with an adeno-associated virus, serotype 8 with Cre recombinase expressed under the control of the thyroxine-binding globulin promoter (AAV-Cre). Doxycycline is administered to induce YAP S127A expression in 8- to 12-week-old mice (YAP-Tg).
- B. Representative image of serial section stained YAP-Tg (2 weeks) expressing livers showing Collagen and  $\alpha$ SMA in the portal area.
- C. Dot plots of whole liver RT-qPCR of common Hippo Targets in YAP-Tg livers at the indicated timepoints.
- D. Representative image of Control and YAP-Tg (2 weeks) expressing livers showing CTGF in EYFP-labeled hepatocytes by RISH.
- E. Dot plots of whole liver RT-qPCR of the noted genes after YAP-Tg at the indicated timepoints. Ctl – Control, 5d – 5 day, 2wk – 2 week, 4wk – 4 week. \* $p < 0.05$ , \*\* $p < 0.01$ , \*\*\* $p < 0.001$ .

### FIGURE S2. YAP-Tg cells Potently Upregulate Ductal Genes and Demonstrate Minimal

#### Expression of Fibroblast Genes

- A. Immunofluorescent staining of titrated AAV-Cre YAP-Tg livers for EYFP (YAP-Tg hepatocytes), SMA, and Desmin. Parts of a whole analysis shown below.

- B. Immunofluorescent staining of titrated AAV-Cre YAP-Tg livers for EYFP (YAP-Tg hepatocytes),  $\alpha$ SMA, and Sox9. Parts of a whole analysis shown below.
- C. Expression of ductal genes in sorted hepatocytes in control liver (Ctl) or after 1 week YAP-Tg (1wk) or 6 weeks YAP-Tg (6wk).
- D. Expression of fibroblast genes in sorted hepatocytes in control liver (Ctl) or after 1 week YAP-Tg (1wk) or 6 weeks YAP-Tg (6wk).
- E. Relative mRNA expression of common hepatocyte-associated genes from control (Ctl) and YAP-Tg cells after 2 weeks of expression. Horizontal line represents the mean, each dot represents an experiment. \* $p < 0.05$ , \*\* $p < 0.01$ , \*\*\* $p < 0.001$ , \*\*\*\* $p < 0.0001$ , n.s.= not significant.

**FIGURE S3. A Minimal Number of Cells Undergo Epithelial to Mesenchymal Transition During Acute and Chronic CCl<sub>4</sub> Injury**

- A. Representative YAP/SMA immunostaining of murine livers in control, 1 or 7 treatments of CCl<sub>4</sub>. Parts of a whole analysis shown to the right.
- B. Representative SMA/panCK immunostaining of murine livers in control, 1 or 7 treatments of CCl<sub>4</sub>. Parts of a whole analysis shown to the right.

**FIGURE S4. Liver Neutrophil Proportion are Unaffected by Hepatocyte Yap Status During Chronic CCl<sub>4</sub> injury**

- A. Representative H&E stain of the indicated genotypes after a single dose of CCl<sub>4</sub> showing areas of necrosis. Right, Dot plot of quantified necrotic areas by ImageJ.
- B. Dot plot of serum Alanine Aminotransferase activity 24 hours after CCl<sub>4</sub> treatment in the indicated groups.
- C. Representative flow cytometry plot of liver neutrophils one day after chronic CCl<sub>4</sub> treatment. Percentages in the graph are of the gated population. Right, dot plot of all

performed experiments (n=5, each). Horizontal line represents the mean, each dot represents a sample.

**FIGURE S5. Liver mRNA Expression is Increased in the Presence of DKO/CCl<sub>4</sub> Injury over CCl<sub>4</sub> Injury Alone**

- A. The top and bottom differentially expressed gene programs identified by GSEA for Ctl vs Ctl/CCl<sub>4</sub>
- B. Dot plots of whole liver RT-qPCR of genes identified by hepatocyte RNA-seq to be increased in DKO/CCl<sub>4</sub> mice to a higher degree than from control mice exposed to CCl<sub>4</sub>. n.s. – not significant, \*p<0.05, \*\*p<0.01. Horizontal line represents the mean, each dot represents an experiment.
- C. The top and bottom differentially expressed gene programs identified by GSEA for DKO vs DKO/CCl<sub>4</sub>

**FIGURE S6. In Hepatocytes, Canonical Hippo Pathway Targets and Inflammatory Genes Are Not Yap/Taz Responsive Genes**

- A. Yap and Taz mRNA hepatocyte expression levels as assessed by RNA-seq under the indicated conditions.
- B. Hippo pathway or inflammatory gene mRNA hepatocyte expression levels as assessed by RNA-seq under the indicated conditions. Transcripts per million base pairs (TPM). n.s. – not significant, \*p<0.05, \*\*p<0.01. Horizontal line represents the mean, each dot represents an experiment. Upper and lower bounds represent SEM.

**FIGURE S7. Cyr61 is the Primary Macrophage Chemoattractant of the Hippo Pathway**

- A. Dot plot of transwell migration assay of the macrophage cell line RAW264.7 to control or Cyr61 supplemented media.

- B. Dot plot of flow cytometry analysis for liver neutrophils (CD45<sup>+</sup>CD11b<sup>+</sup>Ly6G<sup>+</sup>) or macrophages (CD45<sup>+</sup>CD11b<sup>+</sup>Ly6G<sup>-</sup>F4/80<sup>+</sup>) in AAV-EGFP or AAV-Cyr61 mice, one week after treatment.
- C. Immunostaining for Yap and pH3 in Control, Yap-Tg and Yap-Tg/sgCyr61 livers at 2 weeks of induction. Right, Dot plot of pH3<sup>+</sup>/100 nuclei for the indicated conditions.

**FIGURE S8. Relationship of YAP and TAZ to CYR61 mRNA expression in NASH patients**

X-Y plots  $\Delta\Delta C_t$  of Yap-Cyr61 and Taz-Cyr61 expression from NASH patients.



## SUPPLEMENTAL METHODS

### *CCl<sub>4</sub> and CDE Injury*

20% CCl<sub>4</sub> in corn oil was administered through intraperitoneal(IP) injections at a dose of 1 µg/g body weight every 72 hour intervals. Injury was either acute(1 injection) or chronic(7 injections). Unless otherwise indicated, animals were analyzed three days after the last dose of CCl<sub>4</sub>. The CDE diet was purchased from MP Biomedicals(Solon, OH, Cat# 02960214) and provided to mice *ad libitum* at the start of the experiment.

### *Tissue Preparation, Staining, Immunohistochemistry and RNA in situ Hybridization(RISH)*

Tissue was fixed overnight in 10% formalin(Sigma-Aldrich, St. Louis, MO) and embedded in paraffin for sectioning. 5 µm tissue sections were rehydrated followed by antigen retrieval using low pH Antigen Unmasking Solution(Vector Labs, Burlingame, CA). Antibodies used in this study are noted in **Supplementary Table 2**. For immunohistochemistry, Vectastain Elite ABC kit and secondary antibody (Vector Labs) were used to detect primary antibody expression. For immunofluorescence, the Alexa series of fluorescently labeled antibodies (Thermo-Fisher Scientific, Waltham, MA) were used as secondary antibodies at a 1:1000 dilution. Confocal imaging was performed on a Zeiss LSM 710.

Collagen staining was accomplished by incubating rehydrated liver sections in 0.04% Direct Red 80(Cat# 365548, Sigma-Aldrich)/0.01% Fast Green(Cat# F7258, Sigma-Aldrich) in picric acid solution. Collagen quantification is performed by examining a minimum of five random fields in at least three mice using the density quantification function in ImageJ.

For studies of *in vivo* cell proliferation, experimental mice were given a single 100 mg/kg IP injection of EdU in PBS, 24 hours prior to sacrifice. Rehydrated liver sections were incubated at room temperature with Click-iT cocktail(Thermo-Scientific) according to the manufacturer's

directions followed by mounting and fluorescent imaging on a Zeiss Axiovert 200(Carl Zeiss Microscopy, Jena, Germany).

RISH is performed with RNAScope 2.5 HD Duplex Reagent Kit(Advanced Cell Diagnostics, Cat# 322430). Probes for mCTGF(Cat# 314541), mCyr61(Cat# 429001) and hCyr61(Cat# 452081) were used.

#### *Cell Migration Assay*

*24 hours prior to seeding migration experiments, TIB-71 RAW 264.7(ATCC) mouse macrophages were serum-starved: media was changed from DMEM(Gibco #11995-065) + 10% FBS(22)(Gibco #104370-028), to DMEM + 1% FBS. At seeding,  $1 \times 10^5$  cells in DMEM + 1% FBS were placed into Corning Fluoroblok 24-well format cell culture inserts(#351152). Cells were allowed to migrate for 19 hours toward either fresh media(DMEM/F12 + 10% FBS), fresh media + 2ug/ml rhCyr61/Fc Chimera(R&D Systems #4055-CR), or fresh media + 4ug/ml BSA (Sigma #A2153). Inserts were then placed into 4  $\mu$ M Calcein-AM(Corning #354217) and imaged on an epifluorescent microscope at 10x magnification. Composite images showing cells on the trans side along the entire length of each insert were quantified using ImageJ.*

#### *Assessment of YAP, TAZ, CYR61 Expression in NASH Patient Samples*

*Patient liver explants were obtained at the time of surgery after informed consent. These were evaluated as having a low or high NASH score (22) by an independent clinical pathologist with a total of 10 patients per group. These were either immunostained for YAP or TAZ or probed for CYR61 (ACDBio, Newark, CA, Cat# 452081). Two independent blinded investigators scored the staining intensity of each slide. Staining was scored as 0 – none, 1 - minimal, 2 – moderate, 3 – moderate/severe, 4 – severe. RNA was extracted from this cohort from paraffin samples using Qiagen RNeasy FFPE Kit (Cat# 73504) and qPCR performed as noted above.*

### *Statistical Analysis*

*A minimum of three separate mice was combined for all displayed graphs unless otherwise indicated. Student's t-test was used to determine significance unless otherwise indicated.*

*Significance is defined as a p value of 0.05 or less. Error bars on all graphs are standard error of the mean.*

### *Tissue Preparation, Staining, Immunohistochemistry and RNA in situ Hybridization (RISH)*

Tissue was fixed overnight in 10% formalin (Sigma-Aldrich, St. Louis, MO) and embedded in paraffin for sectioning. 5 µm tissue sections were rehydrated followed by antigen retrieval using low pH Antigen Unmasking Solution (Vector Labs, Burlingame, CA). Antibodies used in this study are noted in **Supplementary Table 2**. For immunohistochemistry, Vectastain Elite ABC kit and secondary antibody (Vector Labs) were used to detect primary antibody expression. For immunofluorescence, the Alexa series of fluorescently labeled antibodies (Thermo-Fisher Scientific, Waltham, MA) were used as secondary antibodies at a 1:1000 dilution. Confocal imaging was performed on a Zeiss LSM 710.

Collagen staining was accomplished by incubating rehydrated liver sections in 0.04% Direct Red 80 (Cat# 365548, Sigma-Aldrich)/0.01% Fast Green (Cat# F7258, Sigma-Aldrich) in picric acid solution. Collagen quantification is performed by examining a minimum of five random fields in at least three mice using the density quantification function in ImageJ.

For studies of *in vivo* cell proliferation, experimental mice were given a single 100 mg/kg IP injection of EdU in PBS, 24 hours prior to sacrifice. Rehydrated liver sections were incubated at room temperature with Click-iT cocktail (Thermo-Scientific) according to the manufacturer's directions followed by mounting and fluorescent imaging on a Zeiss Axiovert 200 (Carl Zeiss Microscopy, Jena, Germany).

RISH is performed with RNAScope 2.5 HD Duplex Reagent Kit (Advanced Cell Diagnostics, Cat# 322430). Probes for mCTGF (Cat# 314541), mCyr61 (Cat# 429001) and hCyr61 (Cat# 452081) were used.

#### *Liver qRT-PCR and Hepatocyte Isolation for qRT-PCR and RNA-Seq Analysis*

Whole liver total RNA was isolated using Trizol Reagent (Thermo-Fisher) according to the manufacturer's directions. This RNA was reversed transcribed using iScript (Bio-Rad, Hercules, CA) and was used as material to perform reverse-transcription qPCR on a StepOnePlus using Fast Taqman reagents (Thermo-Fisher). mRNA expression levels were estimated using the  $2^{-\Delta\Delta C_T}$  method. A full inventory of probes is available in **Supplementary Table 5**.

For hepatocyte isolations, mice containing either TetOYap or Yap/Taz floxed alleles and the inducible tdTomato reporter allele were administered AAV-TBG-Cre one week prior to experimentation. Control hepatocytes were isolated from tdTomato reporter mice after the administration of AAV-TBG-Cre. After collagenase perfusion of the liver, the livers were mechanically disassociated and resuspended for fluorescent-activated cell sorting on a BD FACSAria II (BD Biosciences, San Jose, CA). Hepatocytes were purified using a strategy gating for DAPI<sup>-</sup>tdTomato<sup>+</sup> cells. RNA from these cells were isolated using the RNeasy Micro Kit (Qiagen, Germantown, MD) according to the manufacturer's directions. Illumina sequencing libraries were prepared with the TruSeq Stranded mRNA Library Preparation Kit (Illumina Inc., San Diego, CA) and run on a HiSeq 2500.

#### *Intrahepatic Lymphocyte (IHL) Purification*

Intrahepatic lymphocytes were purified according to the procedure outlined by Blom et al.<sup>20</sup> Briefly, livers are isolated and flushed with PBS/Collagenase. These are mechanically disassociated and forced through a 100  $\mu$ m sieve. Lymphocytes are recovered through a Percoll gradient (Sigma-Aldrich, Cat# P4937) and resuspended for immunostaining. IHLs were



stained either one week after Yap induction or 24 hours after the last dose of CCl<sub>4</sub>. See **Supplemental Table 3** for antibody details.

#### *Immunoblotting*

Whole liver lysates of the indicated treatments were run on SDS-PAGE gels and immunoblotted by standard methods. See **Supplemental Table 4** for antibody details.

#### *Bioinformatic Analysis*

*Samples were processed through the bcbio-nextgen RNA-seq pipeline, version 1.0.0a0-8aa8f0c. Samples were aligned to mm10 augmented with the Ensembl gene models using the STAR aligner. Quality control information from FastQC version 0.11.5, samtools 1.3.1, qualimap 2.2 and custom tools was calculated from the STAR alignments. Transcript level quantifications were calculated with Sailfish version 0.10.1 and imported for gene-level differential expression using tximport. Samples were quality controlled and differential expression was calculated with DESeq2, fitting a model looking at the effect of genotype, treatment and their interaction. Transcript-level differential expression was performed with sleuth, fitting a similar model. GSEA was performed for each contrast by ranking genes based on signed signal-to-noise ratio with clusterProfiler.*

#### *Cell Migration Assay*

*24 hours prior to seeding migration experiments, TIB-71 RAW 264.7 (ATCC) mouse macrophages were serum-starved: media was changed from DMEM (Gibco #11995-065) + 10% FBS (Gibco #104370-028), to DMEM + 1% FBS. At seeding, 1x10<sup>5</sup> cells in DMEM + 1% FBS were placed into Corning Fluoroblok 24-well format cell culture inserts (#351152). Cells were allowed to migrate for 19 hours toward either fresh media (DMEM/F12 + 10% FBS), fresh media + 2ug/ml rhCyr61/Fc Chimera (R&D Systems #4055-CR), or fresh media + 4ug/ml BSA (Sigma #A2153). Inserts were then placed into 4 μM Calcein-AM (Corning #354217) and*

*imaged on an epifluorescent microscope at 10x magnification. Composite images showing cells on the trans side along the entire length of each insert were quantified using ImageJ.*

#### *Assessment of Yap, Taz, Cyr61 Expression in NASH Patient Samples*

*Patient liver explants were obtained at the time of surgery after informed consent. These were evaluated as low or high grade NASH by an independent clinical pathologist with a total of 10 patients per group. These were either immunostained for Yap or Taz or probed for Cyr61 (ACDBio, Newark, CA, Cat# 452081). Two independent blinded investigators scored the staining intensity of each slide. Staining was scored as 0 – none, 1 - minimal, 2 – moderate, 3 – moderate/severe, 4 – severe. RNA was extracted from this cohort from paraffin samples using Qiagen RNeasy FFPE Kit (Cat# 73504) and qPCR performed as noted above.*

#### *Statistical Analysis*

*A minimum of three separate mice was combined for all displayed graphs unless otherwise indicated. Student's t-test was used to determine significance unless otherwise indicated. Significance is defined as a p value of 0.05 or less. Error bars on all graphs are standard error of the mean.*

#### **SUPPLEMENTAL REFERENCES**

1. Camargo FD, Gokhale S, Johnnidis JB, et al. YAP1 increases organ size and expands undifferentiated progenitor cells. *Current Biology* 2007;17:2054-60.

**SUPPLEMENTAL TABLE 1. NASH Patient Scoring**

| <b>ID</b>      | <b>Steatosis Score</b> | <b>Lobular Inflammation</b> | <b>Hepatocyte Ballooning</b> | <b>Fibrosis</b> |
|----------------|------------------------|-----------------------------|------------------------------|-----------------|
| <b>Control</b> |                        |                             |                              |                 |
| C1             | 0                      | 0                           | 0                            | 0               |
| C2             | 0                      | 0                           | 0                            | 0               |
| C3             | 1                      | 0                           | 0                            | 0               |
| C4             | 0                      | 0                           | 0                            | 0               |
| C5             | 0                      | 0                           | 0                            | 0               |
| C6             | 0                      | 0                           | 0                            | 0               |
| C7             | 0                      | 0                           | 0                            | 0               |
| C8             | 1                      | 0                           | 0                            | 0               |
| C9             | 0                      | 0                           | 0                            | 0               |
| C10            | 0                      | 0                           | 0                            | 0               |
| <b>NASH</b>    |                        |                             |                              |                 |
| H1             | 1                      | 1                           | 2                            | 4               |
| H2             | 3                      | 2                           | 2                            | 4               |
| H3             | 3                      | 2                           | 2                            | 4               |
| H4             | 2                      | 1                           | 1                            | 3               |
| H5             | 2                      | 2                           | 1                            | 3               |
| H6             | 3                      | 2                           | 2                            | 4               |
| H7             | 3                      | 2                           | 1                            | 4               |
| H8             | 3                      | 1                           | 2                            | 3               |
| H9             | 3                      | 1                           | 1                            | 3               |
| H10            | 2                      | 1                           | 2                            | 3               |

**SUPPLEMENTAL TABLE 2 – List of Antibodies for immunocytochemistry**

| Antibody      | Species | Catalog # | Dilution | Manufacturer   | Notes                  |
|---------------|---------|-----------|----------|----------------|------------------------|
| Yap           | Rabbit  | D8H1X     | 1:400    | Cell Signaling | Tyramide amplification |
| DsRed         | Mouse   | 632392    | 1:500    | Clontech       |                        |
| $\alpha$ SMA  | Mouse   | 1A4       | 1:400    | Dako           |                        |
| GFP           | Chicken | GFP-1020  | 1:500    | Aves Labs      |                        |
| panCK         | Rabbit  | Z0622     | 1:1000   | DakoCytomation |                        |
| F4/80         | Rat     | 123106    | 1:200    | BioLegend      |                        |
| pH3           | Rabbit  | 9701      | 1:200    | Cell Signaling |                        |
| Hnf4 $\alpha$ | Mouse   | Ab41898   | 1:200    | Abcam          |                        |
| Rabbit IgG    | Goat    | BA-1000   | 1:200    | Vector Labs    | Biotinylated           |
| Mouse IgG     | Mouse   | MKB-2225  | 1:250    | Vector Labs    | Biotinylated           |

**SUPPLEMENTAL TABLE 3 – List of Antibodies for flow cytometry**

| Antibody | Species | Catalog # | Dilution | Manufacturer | Clone# |
|----------|---------|-----------|----------|--------------|--------|
| CD45     | Rat     | 103126    | 1:200    | BioLegend    | 30-F11 |
| CD11b    | Rat     | 101212    | 1:200    | BioLegend    | M1/70  |
| F4/80    | Rat     | 123106    | 1:200    | BioLegend    | BM8    |
| Ly6G     | Rat     | 127608    | 1:200    | BioLegend    | 1A8    |

**SUPPLEMENTAL TABLE 4 – List of Antibodies for Immunoblotting**

| Antibody     | Species | Catalog # | Dilution | Manufacturer   |
|--------------|---------|-----------|----------|----------------|
| F4/80        | Rat     | 123106    | 1:200    | BioLegend      |
| Yap          | Rabbit  | 4912      | 1:1000   | Cell Signaling |
| Taz          | Rabbit  | 48835     | 1:1000   | Cell Signaling |
| $\alpha$ SMA | Mouse   | 1A4       | 1:300    | Dako           |
| Cyr61        | Rabbit  | ab24448   | 1:1000   | Abcam          |
| Gapdh        | Rabbit  | 4970      | 1:1000   | Cell Signaling |



|                |       |      |        |                |
|----------------|-------|------|--------|----------------|
| $\beta$ -Actin | Mouse | 3700 | 1:1000 | Cell Signaling |
|----------------|-------|------|--------|----------------|

**SUPPLEMENTAL TABLE 5 – List of probes/primers for qRT-PCR**

All Taqman probes were purchased from Thermo-Scientific.

| Gene   | Catalog number |
|--------|----------------|
| IHH    | Mm00439613_m1  |
| Col1A1 | Mm00801666_g1  |
| Ctgf   | Mm01192933_g1  |
| F4/80  | Mm00802529_m1  |
| 18S    | 4319413E       |
| Pdgfc  | Mm00480205_m1  |
| Timp1  | Mm00441818_m1  |
| TNF    | Mm00443258_m1  |
| Taz    | Mm01289583_m1  |
| Yap1   | Mm01143263_m1  |

|              |               |
|--------------|---------------|
| TGFb1        | Mm01178820_m1 |
| TGFb2        | Mm00436955_m1 |
| IL-10        | Mm01288386_m1 |
| IL-1 $\beta$ | Mm00434228_m1 |
| Sox9         | Mm00448840_m1 |
| IL-6         | Mm00446190_m1 |
| Jag1         | Mm00496902_m1 |
| Notch2       | Mm00803077_m1 |
| Yap          | Hs00902712_g1 |
| Taz          | Hs00210007_m1 |
| Cyr61        | Hs00155479_m1 |
